# Supplementary material for: Carbon burial in deep-sea sediment and implications for oceanic inventories of carbon and alkalinity over the last glacial cycle
Source: Copernicus journal article supplement (doi:10.5194/cp-14-1819-2018), 2018-11-28
Supplement: Supplementary file [file cp-14-1819-2018-supplement-title-page.pdf › cp-14-1819-2018-supplement-title-page.pdf]

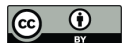

## *Supplement of*

# **Carbon burial in deep-sea sediment and implications for oceanic inventories of carbon and alkalinity over the last glacial cycle**

**Olivier Cartapanis et al.**

*Correspondence to:* Olivier Cartapanis ([olivier.cartapanis@geo.unibe.ch](mailto:olivier.cartapanis@geo.unibe.ch))

- [cp-14-1819-2018-supplement-title-page.pdf](#)
- [Supplementary data.xlsx](#)

The copyright of individual parts of the supplement might differ from the CC BY 4.0 License.
